# Supplementary material for: Micronutrients Dietary Supplementation Advices for Celiac Patients on Long-Term Gluten-Free Diet with Good Compliance: A Review
Source: Medicina (Kaunas). 2019 Jul 3;55(7):337. doi: 10.3390/medicina55070337 (PMC6681258; doi:10.3390/medicina55070337)
Supplement: Supplementary file 1 [file medicina-55-00337-s001.pdf]

Table S1. Original articles concerning circulating levels and supplementation of micronutrients in celiac patients.

| First author, year     | Population (M/F); age                                                                                                                                                                                                | Time spend on GFD             | Primary endpoint                                 | Results                                                                                                                                                                                                                                                                                                                                                                                                                               |
|------------------------|----------------------------------------------------------------------------------------------------------------------------------------------------------------------------------------------------------------------|-------------------------------|--------------------------------------------------|---------------------------------------------------------------------------------------------------------------------------------------------------------------------------------------------------------------------------------------------------------------------------------------------------------------------------------------------------------------------------------------------------------------------------------------|
| Dahele, 2001           | Thirty-nine celiac adults (7M/32F); median age: 48 years (range 22-77 years)                                                                                                                                         | Median 4 months (2-13 months) | PLASMA LEVELS<br>vitamin B12, folate             | Sixteen (41%) patients were vitamin B12 deficient (<220 ng/L). Concomitant folate deficiency was present in only 5/16 (31%) of the vitamin B12 patients, suggesting that the subnormal vitamin B12 levels were not secondary to folate deficiency                                                                                                                                                                                     |
| Dickey, 2008           | One hundred celiac adults (29M/71F) (35 newly diagnosed; 24 with persistent gluten atrophy; 41 with recovered villous atrophy); median age: 55 years<br>Two hundred healthy controls                                 | At least 12 months            | PLASMA LEVELS<br>Vitamin B12                     | Both untreated and persistent VA patients have lower vitamin B12 concentrations, there were no significant differences in vitamin B12 concentrations between controls and any of the patient groups.                                                                                                                                                                                                                                  |
| Hallert, 2002          | Thirty celiac adults (12M/18F); median age: 55 years (range, 45–64 years)                                                                                                                                            | Median 10 years (8-12 years)  | PLASMA LEVELS<br>Folate, vitamin B6, vitamin B12 | Eleven patients (37%) had low plasma vitamin B6 levels; 6 (20%) patients had low plasma folate levels; None had low plasma vitamin B12                                                                                                                                                                                                                                                                                                |
| Howard, 2002           | Two hundred fifty-eight patients celiac adults (26M/232F); median age: 47 years (range 16–80 years).                                                                                                                 |                               | PLASMA LEVELS<br>Iron, folate                    | Two hundred forty-seven patients had iron deficiency alone, 10 folate deficiency alone, and one combined iron and folate deficiency. Twelve (4.7%) of the 258 patients with iron and/or folate deficiency who consented to coeliac disease antibody testing had histologically confirmed CD                                                                                                                                           |
| Hallert, 1981          | Forty-eight celiac adults (18M/30F); men median age: 48.1 years (27-70 years), women median age 50.1 years (range 26-82 years)                                                                                       |                               | PLASMA LEVELS                                    | The serum folate levels were low in 40 patients (85%)                                                                                                                                                                                                                                                                                                                                                                                 |
| Sategna-Guidetti, 2000 | Eighty-six celiac adults (22M/64F), men median age: 29 years, (range 19-67 years), 54 pre-menopausal women, median age: 29 years (range 19-51 years) and 10 postmenopausal, median age: 55 years (range 45-67 years) | 1 year                        | PLASMA LEVELS                                    | At time of diagnosis, approximately 50% of patients had anemia, caused by isolated deficiencies of iron and/or folic acid. A 1-year GFD led to a significant improvement in bone mineral density, bone metabolism and nutrition, except for folic acid, albumin and pre-albumin serum levels which persisted as abnormal in patients with obdurate mucosal impairment. Intestinal biopsy which showed a mucosal recovery in only 57%. |
| Larussa, 2012          | Seventy celiac adults (13M/57F); median age: 40.5 years (range 20-68 years)                                                                                                                                          | At least 2 years              | PLASMA LEVELS<br>Calcium                         | No patient showed low levels of serum calcium                                                                                                                                                                                                                                                                                                                                                                                         |

|               |                                                                                                                                                                                                    |                                  |                                                                                                                                                   |                                                                                                                                                                                                                                                                                |
|---------------|----------------------------------------------------------------------------------------------------------------------------------------------------------------------------------------------------|----------------------------------|---------------------------------------------------------------------------------------------------------------------------------------------------|--------------------------------------------------------------------------------------------------------------------------------------------------------------------------------------------------------------------------------------------------------------------------------|
| Larussa, 2017 | Sixty-four celiac adults (18M/46F) median age: 36 years (range 18–69 years)                                                                                                                        | At least 2 years                 | PLASMA LEVELS<br>Calcium, vitamin D                                                                                                               | Serum calcium and vitamin D were normal                                                                                                                                                                                                                                        |
| Rujner, 2004  | Forty-one pediatric celiac patients (12M/29F), boys median age 12.8 years (range 5.9-16.7 years), females mean age 13.6 years (range 5.9–18.3 years); 28 untreated patients and 8 healthy controls | Median 11 years (2.7-17.3 years) | PLASMA LEVELS<br>Magnesium                                                                                                                        | Tissue Mg deficiency in 1/5 of the examined patients with CD. Mg deficiency was clinically symptom-less and occurred with a similar frequency in coeliac patients treated with a GFD, with subclinical CD, and in control group, and was equally frequent in males and females |
| Hallert, 2009 | Sixty-five celiac patients (24M/41F), aged 45–64 years                                                                                                                                             | Median 15.5 years (8–29 years)   | SUPPLEMENTATION<br>B vitamin supplementation (daily dose of 0.8 mg folic acid, 0.5 mg cyanocobalamin and 3 mg pyridoxine or placebo for 6 months) | Improvement of psychological well-being, and a significant return to normal vitamin B12 values with reduction of homocysteine values in treatment group                                                                                                                        |
| Muzzo, 2000   | Nineteen celiac children (3M/16F), age 6-15 years, 19 healthy controls                                                                                                                             | At least 2 years                 | SUPPLEMENTATION<br>1000 mg of calcium and 400 U of vitamin D daily for 24 months                                                                  | Celiac patients had mean calcium intakes of 739 mg per day, that increased to 1444 mg per day after nutritional supplementation, with 84 and 74% of compliance during the first and second years of supplementation.                                                           |

## References

Dahele, A.; Ghosh, S. Vitamin B12 Deficiency in Untreated Celiac Disease. *Am. J. Gastroenterol.* **2001**, *96* (3), 745–750.

Dickey, W.; Ward, M.; Whittle, C. R.; Kelly, M. T.; Pentieva, K.; Horigan, G.; Patton, S.; McNulty, H. Homocysteine and Related B-Vitamin Status in Coeliac Disease: Effects of Gluten Exclusion and Histological Recovery. *Scand. J. Gastroenterol.* **2008**, *43* (6), 682–688.

Hallert, C.; Grant, C.; Grehn, S.; Grännö, C.; Hultén, S.; Midhagen, G.; Ström, M.; Svensson, H.; Valdimarsson, T. Evidence of Poor Vitamin Status in Coeliac Patients on a Gluten-Free Diet for 10 Years. *Aliment. Pharmacol. Ther.* **2002**, *16* (7), 1333–1339.

Howard, M. R.; Turnbull, A. J.; Morley, P.; Hollier, P.; Webb, R.; Clarke, A. A Prospective Study of the Prevalence of Undiagnosed Coeliac Disease in Laboratory Defined Iron and Folate Deficiency. *J. Clin. Pathol.* **2002**, *55* (10), 754–757.

Hallert, C.; Tobiasson, P.; Walan, A. Serum Folate Determinations in Tracing Adult Coeliacs. *Scand. J. Gastroenterol.* **1981**, *16* (2), 263–267.

Sategna-Guidetti, C.; Grosso, S. B.; Grosso, S.; Mengozzi, G.; Aimo, G.; Zaccaria, T.; Di Stefano, M.; Isaia, G. C. The Effects of 1-Year Gluten Withdrawal on Bone Mass, Bone Metabolism and Nutritional Status in Newly-Diagnosed Adult Coeliac Disease Patients. *Aliment. Pharmacol. Ther.* **2000**, *14* (1), 35–43.

Larussa, T.; Suraci, E.; Nazionale, I.; Leone, I.; Montalcini, T.; Abenavoli, L.; Imeneo, M.; Pujia, A.; Luzzza, F. No Evidence of Circulating Autoantibodies against Osteoprotegerin in Patients with Celiac Disease. *World J. Gastroenterol.* **2012**, *18* (14), 1622–1627.

Larussa, T.; Suraci, E.; Imeneo, M.; Marasco, R.; Luzzza, F. Normal Bone Mineral Density Associates with Duodenal Mucosa Healing in Adult Patients with Celiac Disease on a Gluten-Free Diet. *Nutrients* **2017**, *9* (2), 98.

Rujner, J.; Socha, J.; Syczewska, M.; Wojtasik, A.; Kunachowicz, H.; Stolarczyk, A. Magnesium Status in Children and Adolescents with Coeliac Disease without Malabsorption Symptoms. *Clin. Nutr.* **2004**, *23* (5), 1074–1079.

Hallert, C.; Svensson, M.; Tholstrup, J.; Hultberg, B. Clinical Trial: B Vitamins Improve Health in Patients with Coeliac Disease Living on a Gluten-Free Diet. *Aliment. Pharmacol. Ther.* **2009**, *29* (8), 811–816.

Muzzo, S.; Burrows, R.; Burgueño, M.; Ríos, G.; Bergenfreid, C.; Chavez, E.; Leiva, L. Effect of Calcium and Vitamin D Supplementation on Bone Mineral Density of Celiac Children. *Nutr. Res.* **2000**, *20* (9), 1241–1247.
